# Supplementary material
Source: MDPI journal article supplement (https://www.mdpi.com/2073-4344/12/3/279)
Supplement: s1 [file s1]

# Identification of New Dioxygenases Able to Recognize Polycyclic Aromatic Hydrocarbons with High Aromaticity

Content

Figure S1: Main principle of aerobic degradatio of PAHs.

Figure S2: (a) Bioremediation of PAHs by organism and (b) Pathways for degradation of naphthalene by *Pseudomonas putida*.

Table S1: PAHs biodegradation by different microorganism.

Table S2: Molecule surface area of dioxygenases and PAHs.

Table S3: Docking scores of biodegrade PAHs by dioxygenases from different microorganisms.

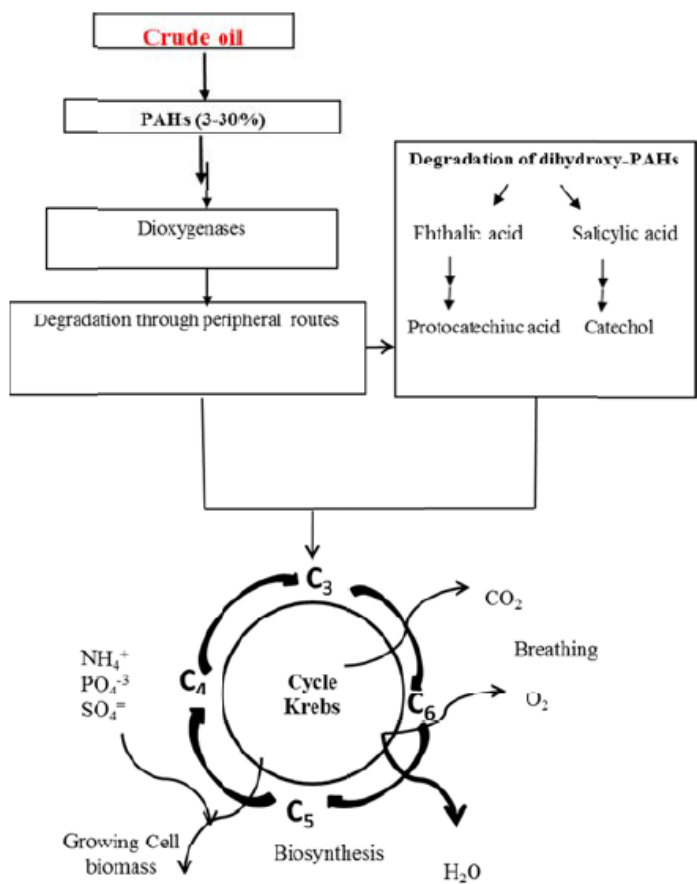

Figure S1: Main principle of aerobic degradatio of PAHs.

(a)

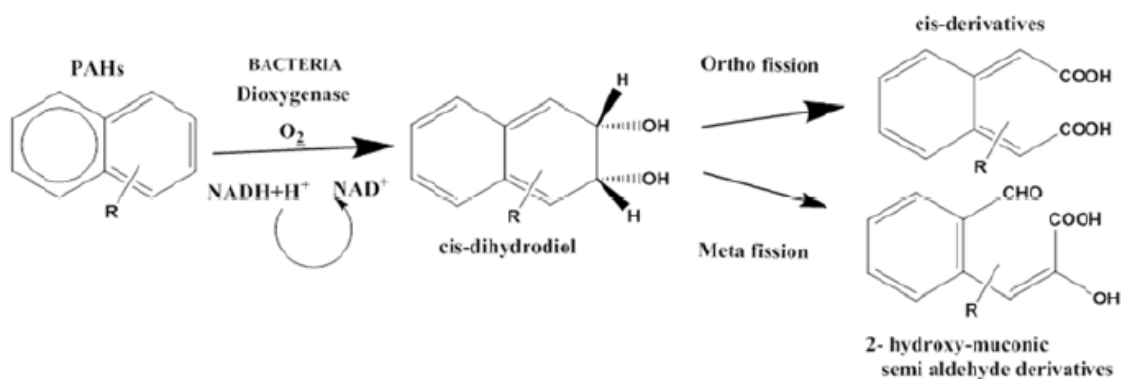

(b)

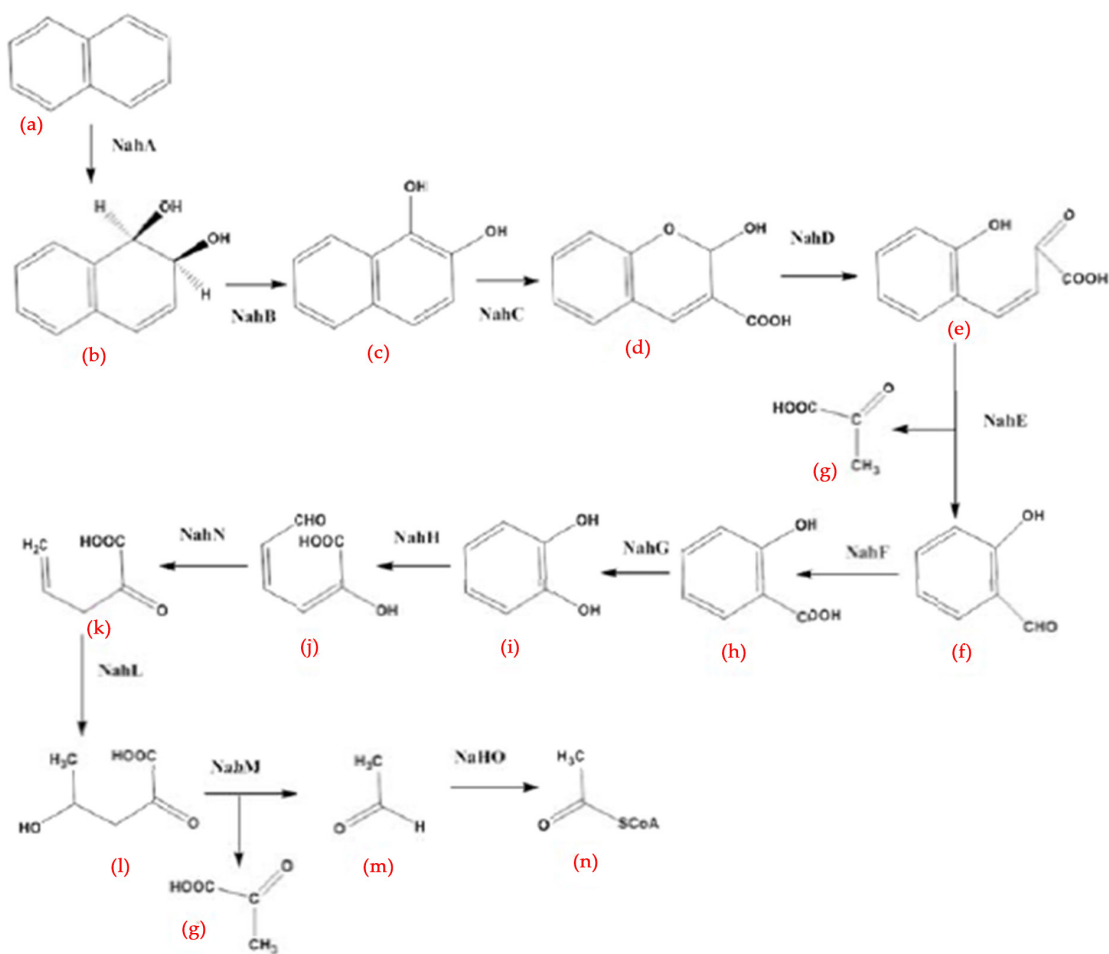

Figure S2: (a) Bioremediation of PAHs by organism and (b) Pathways for degradation of naphthalene by *Pseudomonas putida*.

NahA, naphthalene dioxygenase; NahB, cis-1,2-dihydro-1,2-dihydroxynaphthalene-1,2-dehydrogenase; NahC, 1,2-dihydroxynaphthalene dioxygenase; NahD, 2-hydroxychromene-2-carboxylate isomerase; NahE, trans-o-hydroxybenzylindene pyruvate hydratase-aldolase; NahF,

salicylaldehyde hydrogenase; *NahN*, 2-hydroxymuconic semialdehyde hydrolase; *NahL*, 2-oxopenta-4-dienoate hydratase; *NahM*, 4-hydroxy-2-oxovalerate aldolase; *NahO*, acetaldehyde dehydrogenase.

Products: a) naphthalene; b) cis-1,2-dihydro-1,2-dihydroxynaphthalene; c) 1,2-dihydroxynaphthalene; d) 2-hydroxychromene-2-carboxylic acid; e) cis-o-hydroxybenzylpyruvate; f) salicylaldehyde; g) pyruvate; h) salicylate; i) catechol; j) 2-hydroxymuconic semialdehyde; k) 2-oxovalerate-4-dienoate; l) 4-hydroxy-2-oxovalerate; m) acetaldehyde; n) acetal-CoA

Table S1: PAHs biodegradation by different microorganism.

| PAHs        | Microorganism                                                                             | Biodegradation (%) | Literature |
|-------------|-------------------------------------------------------------------------------------------|--------------------|------------|
| Naphthalene | <i>Sphingomonas paucimobilis</i> EPA 505                                                  | 96.3%              | [7]        |
|             | <i>Sphingobium yanoikuyae</i> B1                                                          | -                  | Benzo(hi)  |
|             | <i>Sphingomonas paucimobilis</i> NBRC 139345                                              | -                  | [7]        |
|             | <i>Actinobacteria</i>                                                                     | -                  | -          |
|             | <i>Rhodococcus wratislaviensis</i> IFP 2016 and <i>Rhodococcus aetherivorans</i> IFP 2017 | 90%                | [27]       |
| Anthracene  | <i>Actinobacteria</i>                                                                     | 93.3%              | [27]       |
|             | <i>Sphingobium yanoikuyae</i> B1                                                          | 28.7%              | [7]        |
|             | <i>Sphingomonas paucimobilis</i> EPA 505                                                  | -                  | [7]        |
|             | <i>Sphingomonas</i> sp. BA2                                                               | ~26%               | [6]        |
|             | <i>Mycobacterium gilvum</i> VF1                                                           | 53%, 58%, 71%      | [4]        |
|             | <i>Dyadobacteria koreensis</i>                                                            | 75%                | [7]        |
|             | <i>Rhodococcus wratislaviensis</i> IFP 2016 and <i>Rhodococcus aetherivorans</i> IFP 2017 | >90%               | [27]       |
|             | <i>Norcardia, beijerinckia</i> <i>Paracoccus</i>                                          | -                  | -          |
| Pyrene      | <i>Micobacterium gilvum</i> VF1                                                           | 53%, 58%, 71%      | [4]        |
|             | <i>Dyadobacteria koreensis</i>                                                            | 73%                | [7]        |
|             | <i>Sphingomonas paucimobilis</i> EPA 505                                                  | 95%                | [7]        |

|                        |                                                                                           |        |      |
|------------------------|-------------------------------------------------------------------------------------------|--------|------|
|                        | <i>Rhodococcus wratislaviensis</i> IFP 2016 and <i>Rhodococcus aetherivorans</i> IFP 2017 | >90%   | [27] |
| Fluoranthene           | <i>Sphingomonas paucimobilis</i> EPA 505                                                  | 85-90% | [7]  |
|                        | <i>Sphingobium yanoikuyae</i> B1                                                          | 20-60% | [19] |
|                        | <i>Sphingomonas paucimobilis</i> NBRC 139345                                              | 82%    |      |
|                        | <i>Mycobacterium</i> sp. Strains KA5, BS5 AND KF4                                         | -      | -    |
| Chrysene               | <i>Pseudomonas aeruginosa</i>                                                             | 65%    | [27] |
|                        | <i>Dyadobacter koreensis</i>                                                              | 72%    | [27] |
| dibenzo[a,h]anthracene | -                                                                                         | -      | -    |
| Indeno[1,2,3-cd]pyrene | <i>Pseudomonas aeruginosa</i>                                                             | -      | [27] |
| Benzo[ghi]perylene     | <i>Pseudomonas aeruginosa</i>                                                             | -      | [27] |
| Benzo[a]pyrene         | <i>Pseudomonas aeruginosa</i>                                                             | -      | [27] |

Table S2: Molecule surface area of dioxygenases and PAHs.

| Protein                                |                                   |                                   |                                   |
|----------------------------------------|-----------------------------------|-----------------------------------|-----------------------------------|
| <i>Paraburkholderia</i><br><b>2xsh</b> | <i>Pseudomonas</i><br><b>4hjl</b> | <i>Sphingobium</i><br><b>2gbx</b> | <i>Phodococcus</i><br><b>1ulj</b> |
| 421.550 Å <sup>2</sup>                 | 2500.585 Å <sup>2</sup>           | 361.44 Å <sup>2</sup>             | 1360.404 Å <sup>2</sup>           |
| Ligands (surface area)                 |                                   |                                   |                                   |
| Naphthalene                            |                                   | 148.537                           |                                   |
| Anthracene                             |                                   | 191.340                           |                                   |
| Chrysene                               |                                   | 229.453                           |                                   |
| Fluoranthene                           |                                   | 260.251                           |                                   |
| Pryrene                                |                                   | 201.585                           |                                   |
| Benzo(a)pyrene                         |                                   | 242.556                           |                                   |
| Dibenzi(a,h)anthracene                 |                                   | -                                 |                                   |
| Indeno(1,2,3-cd)pyrene                 |                                   | 258.116                           |                                   |
| Benzoperylene                          |                                   | -                                 |                                   |

Table S3: Docking scores of biodegrade PAHs by dioxygenases from different microorganisms.

| Docking score (kcal/mol)                                                                              |                                         |                                          |                                             |                                        |
|-------------------------------------------------------------------------------------------------------|-----------------------------------------|------------------------------------------|---------------------------------------------|----------------------------------------|
| No. ID PDB                                                                                            |                                         |                                          |                                             |                                        |
| Microorganism                                                                                         |                                         |                                          |                                             |                                        |
| PAHs                                                                                                  | 2gbx<br><i>Sphingomonas</i><br>Biphenyl | 4hjl<br><i>Pseudomonas</i><br>Napthalene | 2xsh<br><i>Paraburkholderia</i><br>Biphenyl | 1ulj<br><i>Rhodococcus</i><br>Biphenyl |
| 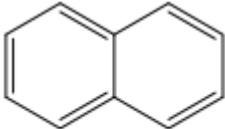<br>naphthalene      | -5.1                                    | -6.1                                     | -5.9                                        | -6.7                                   |
| <br>anthracene       | -7.6                                    | -7.6                                     | -8.3                                        | -7.3                                   |
| <br>fluoranthene    | -6.9                                    | -8.1                                     | -6.5                                        | ---                                    |
| <br>pyrene         | -7.1                                    | -8.1                                     | -7.9                                        | --                                     |
| <br>chrysene       | -7.6                                    | -8.9                                     | -8.4                                        | --                                     |
| <br>benzo[a]pyrene | --                                      | -9.9                                     | --                                          | --                                     |

|                                                                                                                        |    |      |    |    |
|------------------------------------------------------------------------------------------------------------------------|----|------|----|----|
| 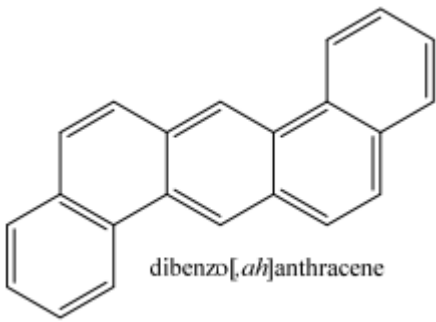 <p>dibenzo[<i>ah</i>]anthracene</p>  | -- | --   | -- | -- |
|  <p>indeno[1,2,3-<i>cd</i>]pyrene</p> | -- | -9.0 | -- | -- |
| <p>benzo[<i>ghi</i>]perylene</p>     | -- | --   | -- | -- |

---No pose obtained
